# Supplementary material for: Resistant mutants of Mycobacterium tuberculosis selected in vitro do not reflect the in vivo mechanism of isoniazid resistance
Source: PubMed Central journal article supplement — J Antimicrob Chemother. 2009 Jul 4;64(3):515–23. doi: 10.1093/jac/dkp237 (PMC2724981; doi:10.1093/jac/dkp237), 2009-07-04

## Supplementary data

**Table S1.** PCR primers used to confirm mutations detected by comparative genome hybridization

| Gene                      | FW primer              | RV primer                | Start position | End position | Length (bp) |
|---------------------------|------------------------|--------------------------|----------------|--------------|-------------|
| MT0208                    | ATTCTGCGTCTGCTCGCGGGGT | GGTTGGCGGTTCGATCCGCACTCC | 234602         | 234775       | 174         |
| MT0516                    | GAAGGTCTCATCTTGCGCAAAC | TTACCGGAGCTCTCTGTTTCGG   | 588602         | 588780       | 169         |
| MT1253                    | GAAGCTACCGCAGACCAGCATC | CTACCGCGACTTGGCCTTTCCC   | 1358101        | 1358302      | 200         |
| $\Delta$ MT1928<br>- 1976 | GAGGTGGTTCGTCTTGAACAGG | CTGAGGTATTGGGCGCGGCAGG   | 2127002        | 2176282      | 245         |

Primers are depicted in the 5'-3' direction, the start and end positions refer to the beginning and end of the PCR product and length refers to the length of the PCR product. Gene ID and start and end positions are based on the annotated genome sequence of strain CDC1551 (GenBank AE000516).

**Table S2.** Genes that are (partially) deleted in strain RB14H5

| Gene          | Name/function                            |
|---------------|------------------------------------------|
| MT1928        | hypothetical protein (partially deleted) |
| MT1929        | P450 haem-thiolate protein               |
| MT1930        | lipoprotein antigen                      |
| MT1931        | short chain dehydrogenase                |
| MT1931.1      | hypothetical protein                     |
| MT1932        | hypothetical protein                     |
| MT1933        | chorismate mutase                        |
| MT1934        | putative esterase/antigen 85-B           |
| MT1935        | hypothetical protein                     |
| MT1936        | hypothetical protein                     |
| MT1937        | hypothetical protein                     |
| MT1940        | hypothetical protein                     |
| MT1941        | hypothetical protein                     |
| MT1942        | hypothetical protein                     |
| MT1943        | hypothetical protein                     |
| MT1944        | hypothetical protein                     |
| MT1945        | hypothetical protein                     |
| MT1946        | zinc-binding dehydrogenase               |
| MT1947        | hypothetical protein                     |
| MT1948        | D-tyrosyl-tRNA deacylase                 |
| MT1949        | hypothetical protein                     |
| MT1950        | hypothetical protein                     |
| MT1951        | hydrolase alpha/beta family              |
| MT1952        | competence damage inducible protein A    |
| MT1953        | sugar transporter family                 |
| MT1954        | hypothetical protein                     |
| MT1955        | anti-anti-sigma factor                   |
| MT1956        | D-amino acid oxidase                     |
| MT1957        | hypothetical protein                     |
| MT1958        | hypothetical protein                     |
| <b>MT1959</b> | <b>catalase peroxidase (<i>katG</i>)</b> |
| MT1960        | ferric uptake regulator protein          |
| MT1961        | phosphatidylethanolamine-binding protein |
| MT1962        | phosphatidylethanolamine-binding protein |
| MT1963        | quinone oxidoreductase                   |
| MT1964        | hypothetical protein                     |
| MT1965        | hypothetical protein                     |
| MT1966        | isocitrate lyase                         |
| MT1968        | PPE family protein                       |
| MT1969        | PPE family protein                       |
| MT1970        | hypothetical protein                     |
| MT1971        | acyltransferase family protein           |
| MT1972        | lipoprotein                              |
| MT1973        | peptidase putative                       |
| MT1974        | esterase putative                        |
| MT1975        | hypothetical protein                     |
| MT1976        | acyl-CoA synthase (partially deleted)    |

Gene ID and name/function of deleted genes are based on the annotated genome sequence of strain CDC1551 (GenBank AE000516).

**Figure S1.** Diagram from comparative genome hybridization data depicting the 49 kbp deletion. The deleted fragment spans 47 genes (see Table S2), including *katG*, coding for the only known catalase(-peroxidase) present in the *M. tuberculosis* genome.

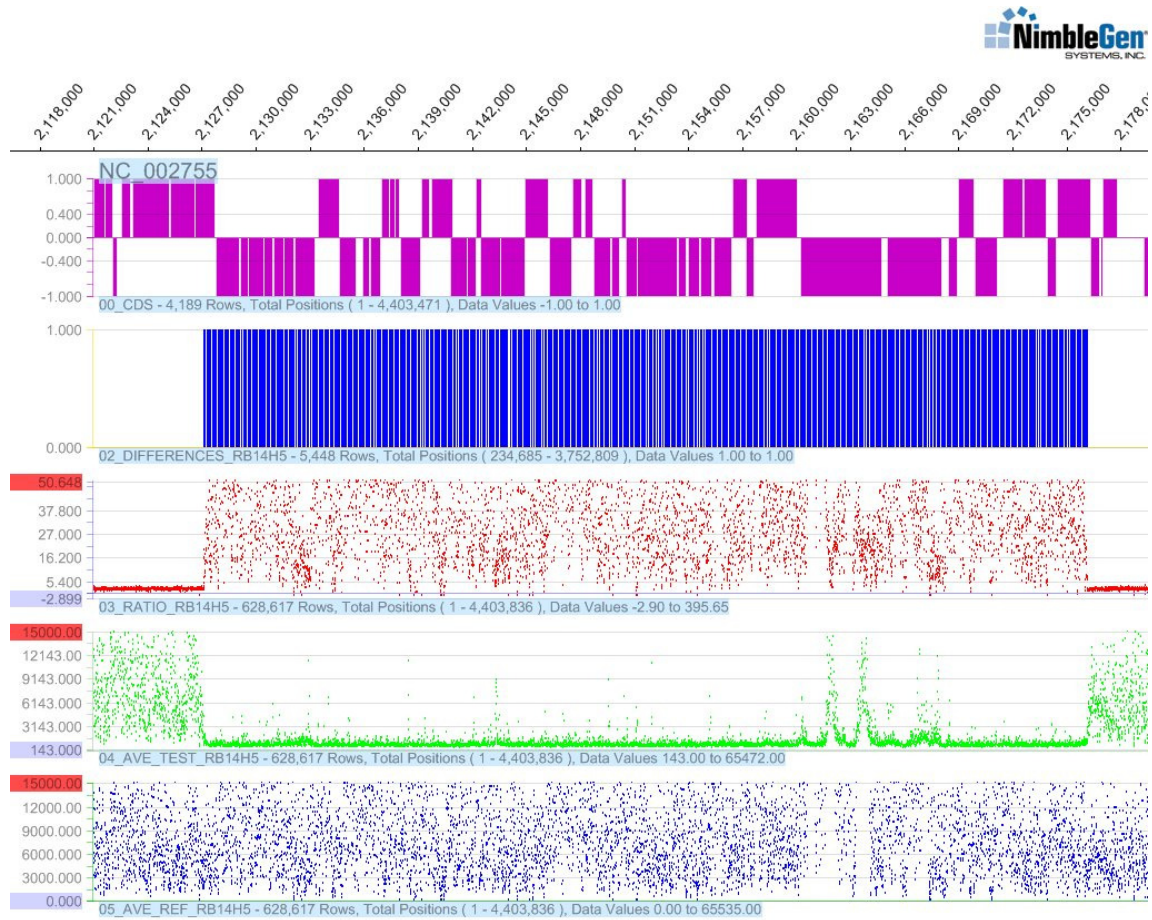

Supplement: dkp237_1.pdf [file dkp237_1.pdf]
